# Supplementary material for: Unilateral hamstring foam rolling does not impair strength but the rate of force development of the contralateral muscle
Source: PeerJ. 2019 May 29;7:e7028. doi: 10.7717/peerj.7028 (PMC6545114; doi:10.7717/peerj.7028)
Supplement: Dataset S6 — Subject information (height, weight, age) [file peerj-07-7028-s006.xlsx]

## Sheet: Subject Info
Subject No.	Gender	Age	Height	Weight	Femur Length	Leg Dominance
S01	F	21	161.5	128	41	R
S02	F	22	163	128.5	37	R
S03	F	18	156	118	40	R
S05	F	22	167	118.5	38	R
S08	F	21	174.5	132.2	44	R
S09	F	18	157.5	118.3	39	R
S10	F	21	169.5	194	38.5	R
S13	F	22	163.5	192	45	R
S14	F	22	158	117.5	43	R
S17	F	21	160	147.2	46	R
S19	F	20	172	166	44	L
S20	F	22	150	113.5	38	R
S21	F	20	159.5	116.4	35	R
S22	F	20	166.5	176.5	43	R
S24	F	20	164.5	124.1	44	R
S26	F	21	166	172.2	39.5	L
S27	F	21	154.5	198.75	40.5	R
S28	F	21	172.5	176	45	R
S29	F	21	161	129.2	43	R
S31	F	20	156.75	135	35.5	R
S33	F	21	164	122	40	R
		20.7143	162.75	143.993			65.4513
		1.14642	6.31368	29.4685			13.3948
S04	M	23	159.5	161	38.5	R
S06	M	27	194.5	214.5	44.5	R
S07	M	28	169.5	168.5	37	R
S11	M	34	181.25	158.7	43	R
S12	M	28	166.25	186	39.5	L
S15	M	23	179	225.5	40	R
S16	M	21	174	189.25	40	R
S18	M	27	184.5	228.5	44.5	R
S25	M	20	169.5	136	48	R
S30	M	22	177.5	185.5	40	R
S32	M	21	169.75	141.75	41.5	R
S34	M	19	175	174.6	44	L
S35	M	24	165.75	239.8	42	L
		24.3846	174.308	185.354			84.2517
		4.21384	9.20606	33.3456			15.1571

## Sheet: _xltb_storage_
XL Toolbox Settings
	export_preset	<?xml version="1.0" encoding="utf-16"?>_x000D_ <Preset xmlns:xsd="http://www.w3.org/2001/XMLSchema" xmlns:xsi="http://www.w3.org/2001/XMLSchema-instance">_x000D_ <Name>Tiff, 300 dpi, Grays, Transparent canvas</Name>_x000D_ <Dpi>300</Dpi>_x000D_ <FileType>Tiff</FileType>_x000D_ <ColorSpace>GrayScale</ColorSpace>_x000D_ <Transparency>TransparentCanvas</Transparency>_x000D_ <UseColorProfile>false</U…
	export_path	C:\Users\Xin Ye\Desktop\Fig 1.tif
